# Supplementary material for: Zika Virus infection of rhesus macaques leads to viral persistence in multiple tissues
Source: PubMed Central journal article supplement (PMC5344528; doi:10.1371/journal.ppat.1006219), 2017-03-09
Supplement: ppat.1006219.s001.pdf [file ppat.1006219.s001.pdf]

| Tissue                 | 7 dpi                      |                               |
|------------------------|----------------------------|-------------------------------|
|                        | 27679<br>male (1e5<br>ffu) | 24504<br>female,<br>(1e5 ffu) |
| Ankle                  | -                          | +                             |
| Axillary LN            | +                          | +                             |
| Bicep                  | -                          | -                             |
| Bladder                | +                          | -                             |
| Brachia                | -                          | -                             |
| Brachial plexus        | +                          | -                             |
| Brain- Cerebellum      | -                          | -                             |
| Brain- Frontal         | -                          | -                             |
| Brain- Hind            | -                          | -                             |
| Cervical LN            | -                          | +                             |
| Cervix                 | -                          | -                             |
| Elbow                  | +                          | +                             |
| Eye                    | -                          | -                             |
| Finger                 | +                          | +                             |
| Hamstring              | -                          | -                             |
| Heart                  | -                          | -                             |
| Inguinal LN            | +                          | +                             |
| Kidney                 | +                          | -                             |
| Knee                   | -                          | -                             |
| Liver                  | -                          | -                             |
| Lung                   | -                          | -                             |
| Mesenteric LN          | +                          | +                             |
| Ovary                  | -                          | -                             |
| Parotid Salivary gland | +                          | -                             |
| Prostate               | -                          | -                             |
| Quadriceps             | +                          | -                             |
| Retroperitoneal LN     | +                          | -                             |
| Sciatic Nerve          | +                          | +                             |
| Skin                   | +                          | -                             |
| Soleus                 | +                          | -                             |
| Spinal Cord- Cervical  | +                          | +                             |
| Spinal Cord- Lumbar    | +                          | -                             |
| Spinal Cord-Thoracic   | +                          | +                             |
| Spleen                 | +                          | +                             |
| Submandibular gland    | -                          | -                             |
| Submandibular LN       | +                          | +                             |
| Testes                 | -                          | -                             |
| Toe                    | +                          | -                             |
| Tricep                 | +                          | -                             |
| Trigeminal ganglion    | +                          | -                             |
| Uterus                 | -                          | +                             |
| Vagina                 | -                          | -                             |
| Wrist                  | +                          | +                             |

| Tissue                 | 28 dpi                       |                            |                              |
|------------------------|------------------------------|----------------------------|------------------------------|
|                        | 24961<br>female<br>(1e4 ffu) | 25147<br>male<br>(1e5 ffu) | 25421<br>female<br>(1e6 ffu) |
| Adrenal gland          | -                            | -                          | -                            |
| Ankle                  | -                            | -                          | -                            |
| Axillary LN            | +                            | +                          | +                            |
| Bicep                  | -                            | -                          | +                            |
| Bladder                | -                            | -                          | +                            |
| Brachia                | -                            | -                          | -                            |
| Brachial plexus        | -                            | -                          | -                            |
| Brain- cerebellum      | +                            | -                          | -                            |
| Brain- frontal         | -                            | -                          | -                            |
| Brain- hind            | -                            | -                          | -                            |
| Cervical LN            | -                            | -                          | -                            |
| Cervix                 | -                            | -                          | -                            |
| Elbow                  | -                            | +                          | +                            |
| Eye                    | -                            | -                          | +                            |
| Finger                 | +                            | +                          | +                            |
| Hamstring              | -                            | -                          | -                            |
| Heart                  | -                            | +                          | +                            |
| Inguinal LN            | +                            | +                          | -                            |
| Kidney                 | +                            | -                          | -                            |
| Knee                   | -                            | +                          | +                            |
| Liver                  | +                            | -                          | -                            |
| Lung                   | -                            | +                          | -                            |
| Mesenteric LN          | +                            | -                          | +                            |
| Ovary                  | -                            | -                          | -                            |
| Parotid Salivary gland | -                            | -                          | -                            |
| Prostate               | -                            | -                          | -                            |
| Quadriceps             | -                            | +                          | -                            |
| Retroperitoneal LN     | +                            | -                          | +                            |
| Salivary gland LN      | -                            | +                          | +                            |
| Sciatic nerve          | -                            | -                          | +                            |
| Seminal vesicles       | -                            | -                          | -                            |
| Skin                   | -                            | -                          | -                            |
| Soleus                 | -                            | -                          | +                            |
| Spinal Cord- Cervical  | -                            | -                          | -                            |
| spinal cord- lumbar    | -                            | -                          | -                            |
| Spinal Cord- Thoracic  | -                            | -                          | -                            |
| Spleen                 | +                            | +                          | +                            |
| Testes                 | -                            | -                          | -                            |
| Submandibular gland    | -                            | -                          | -                            |
| Toe                    | -                            | -                          | -                            |
| Tricep                 | -                            | +                          | -                            |
| Trigeminal ganglion    | -                            | -                          | -                            |
| Uterus                 | -                            | -                          | +                            |
| Vagina                 | -                            | -                          | +                            |
| Wrist                  | +                            | +                          | +                            |

| Tissue                 | 35 dpi                     |                            |
|------------------------|----------------------------|----------------------------|
|                        | 27679<br>male (1e5<br>ffu) | 24504<br>male (1e5<br>ffu) |
| Ankle                  | -                          | -                          |
| Axillary LN            | +                          | +                          |
| Bicep                  | +                          | -                          |
| Bladder                | -                          | -                          |
| Brachia                | +                          | -                          |
| Brachial plexus        | +                          | +                          |
| Brain- cerebellum      | +                          | -                          |
| Brain- frontal         | +                          | -                          |
| Brain-occipital        | +                          | -                          |
| Brain- parietal        | +                          | -                          |
| Brain- temporal        | +                          | -                          |
| Cervical LN            | -                          | -                          |
| Dorsal root ganglion   | +                          | +                          |
| Elbow                  | -                          | -                          |
| Epididymus-body        | -                          | -                          |
| Epididymus-head        | -                          | -                          |
| Epididymus-tail        | -                          | -                          |
| Eye                    | +                          | -                          |
| Finger                 | +                          | +                          |
| Hamstring              | +                          | -                          |
| Heart                  | -                          | -                          |
| Inguinal LN            | +                          | -                          |
| Kidney                 | -                          | -                          |
| Knee                   | +                          | -                          |
| Liver                  | -                          | -                          |
| Lung                   | -                          | -                          |
| Mesenteric LN          | -                          | -                          |
| Parotid Salivary gland | +                          | -                          |
| Prostate               | -                          | +                          |
| Quadriceps             | -                          | +                          |
| Retroperitoneal LN     | -                          | -                          |
| Salivary gland LN      | -                          | -                          |
| Sciatic nerve          | -                          | +                          |
| Spinal Cord- Cervical  | -                          | +                          |
| spinal cord- lumbar    | +                          | +                          |
| Spinal Cord- Thoracic  | -                          | +                          |
| Seminal vesicle        | +                          | +                          |
| Skin                   | -                          | +                          |
| Soleus                 | +                          | +                          |
| Spleen                 | -                          | +                          |
| Submandibular gland    | -                          | -                          |
| Tracheobronchial LN    | -                          | +                          |
| Testes                 | -                          | -                          |
| Toe                    | -                          | -                          |
| Tricep                 | -                          | +                          |
| Trigeminal ganglia     | -                          | +                          |
| Urethra                | +                          | -                          |
| Vas deferens           | -                          | -                          |
| Wrist                  | -                          | +                          |

**Supplemental Table 1: Complete list of tissues examined for ZIKV RNA. +: ZIKV RNA detected (see Fig. 3 for values); -: ZIKV RNA below limit of detection; LN: lymph node**
